# Supplementary material for: Identification of functional tRNA-derived fragments in senescence-accelerated mouse prone 8 brain
Source: publisher site journal article supplement (doi:10.18632/aging.102471), 2019-11-20
Supplement: Supplementary file [file aging-v11i22-102471-supplementary-material-SD1.pdf]

## SUPPLEMENTARY FIGURES

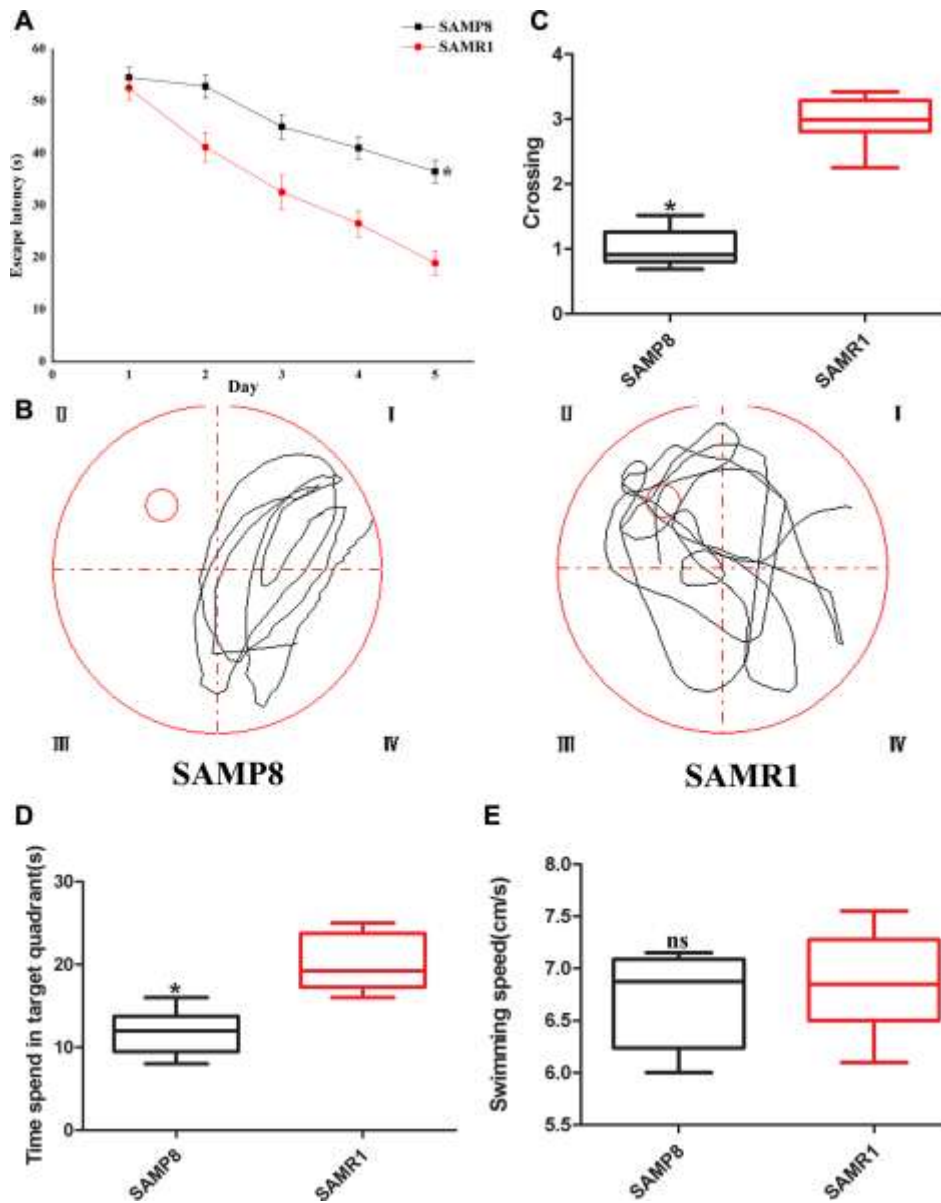

**Supplementary Figure 1. Memory is impaired in SAMP8 mice. We used MWM to test to evaluate learning and memory in 7-month-old SAMP8 and SAMR1 mice (n=8/group). (A) Mean escape latency in the hidden platform experiment. (B) Swimming paths in the spatial probe experiment. (C) Number of crossings in the spatial probe experiment. (D) Time spent in the target quadrant in the spatial probe experiment. (E) Swimming speeds of the mice were similar between the two groups. \* $p < 0.05$ , ns means non-significant.**

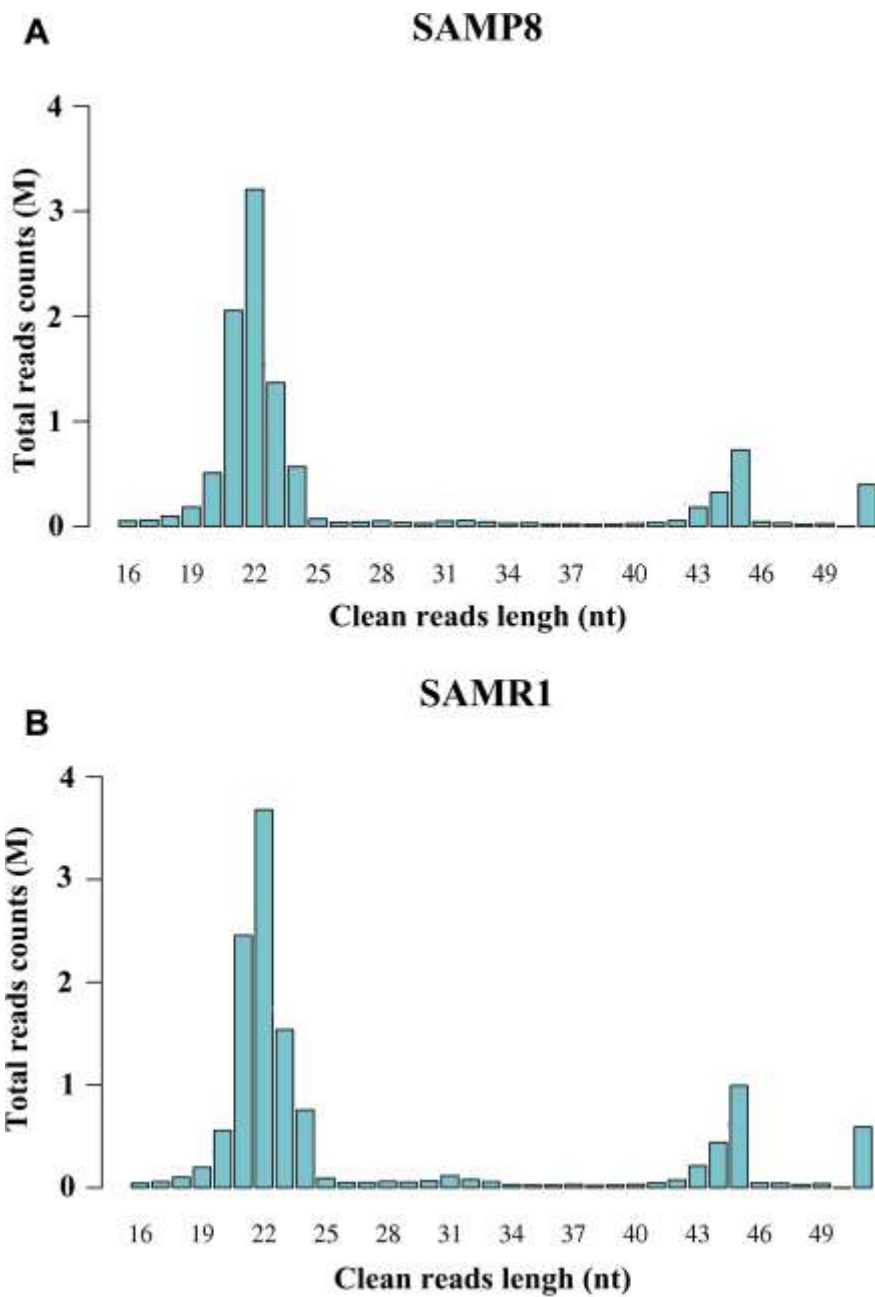

**Supplementary Figure 2. Sequence length distribution of clean reads in the two groups.** Sequence length distribution in (A) SAMP8 and (B) SAMR1 mice.
