# Supplementary material for: Identification of functional tRNA-derived fragments in senescence-accelerated mouse prone 8 brain
Source: Aging (Albany NY). 2019 Nov 20;11(22):10485–98. doi: 10.18632/aging.102471 (PMC6914438; doi:10.18632/aging.102471)
Supplement: Supplementary Table 2 [file aging-11-102471-s002..xlsx]

## Sheet: Table S3
Supplementary table 2 Potential targets of tRFs
tRFs	Target transcript_id	Target gene_name
AS-tDR-011389	ENSMUST00000029632	Lrat
AS-tDR-012690 AS-tDR-013428	ENSMUST00000090180	Sema3g
AS-tDR-012690 AS-tDR-011389	ENSMUST00000110690	Oxct1
AS-tDR-012690	ENSMUST00000187137	Mag
AS-tDR-013428	ENSMUST00000086545	Cdkl4
AS-tDR-012690	ENSMUST00000102518	Ece1
AS-tDR-013428 AS-tDR-011670	ENSMUST00000178401	Zfp870
AS-tDR-011775	ENSMUST00000077741	Slc9a6
AS-tDR-012690	ENSMUST00000153941	Slc38a6
AS-tDR-011775	ENSMUST00000191124	Park2
AS-tDR-011775 AS-tDR-013428	ENSMUST00000033342	Eif3f
AS-tDR-012690	ENSMUST00000060792	Ptrf
AS-tDR-012690	ENSMUST00000192145	Lrba
AS-tDR-010789 AS-tDR-011389	ENSMUST00000006669	Pdk1
AS-tDR-012690	ENSMUST00000164960	Rasgef1a
AS-tDR-013428	ENSMUST00000062387	Kcnj9
AS-tDR-012690	ENSMUST00000067230	Sox4
AS-tDR-011389	ENSMUST00000068261	Atp6v1g2
AS-tDR-012690	ENSMUST00000022416	Anxa11
AS-tDR-012690	ENSMUST00000109815	Camk2b
AS-tDR-011389	ENSMUST00000047309	Nat14
AS-tDR-013428	ENSMUST00000189707	Ppp2r3d
AS-tDR-011775	ENSMUST00000102852	Ptges
AS-tDR-012690	ENSMUST00000021203	Timm22
AS-tDR-011389	ENSMUST00000101800	Msrb1
AS-tDR-011389	ENSMUST00000005620	Dnajb1
AS-tDR-011389	ENSMUST00000045356	Rpl37
AS-tDR-011389	ENSMUST00000050918	Camk2n1
AS-tDR-011775	ENSMUST00000174193	Mobp
AS-tDR-011670 AS-tDR-006835	ENSMUST00000082432	Dio2
AS-tDR-011775	ENSMUST00000062181	Zfp146
AS-tDR-010789 AS-tDR-012690	ENSMUST00000006618	Arhgef19
AS-tDR-013428	ENSMUST00000145910	Strn
AS-tDR-013428	ENSMUST00000172753	Hspa1b
AS-tDR-011775	ENSMUST00000140119	Col9a2
AS-tDR-011389	ENSMUST00000057486	Ankrd46
AS-tDR-011670	ENSMUST00000034121	Man2b1
AS-tDR-005058	ENSMUST00000055389	Xxylt1
AS-tDR-011670 AS-tDR-012690	ENSMUST00000034713	Ldlr
AS-tDR-011775	ENSMUST00000059650	Npsr1
AS-tDR-010789	ENSMUST00000030029	Invs
AS-tDR-012690	ENSMUST00000133544	Tor1b
AS-tDR-010789	ENSMUST00000027343	Ogfrl1
AS-tDR-011670	ENSMUST00000154650	Bcas1
AS-tDR-013428	ENSMUST00000035105	Rpsa
AS-tDR-011389	ENSMUST00000051867	Lsm6
AS-tDR-005058	ENSMUST00000118012	Gm14295
AS-tDR-013428	ENSMUST00000102484	Ddi2
AS-tDR-011389	ENSMUST00000092227	Scyl2
AS-tDR-012690	ENSMUST00000042844	Nbl1
AS-tDR-011389	ENSMUST00000029331	P2ry1
AS-tDR-011389	ENSMUST00000159879	Trove2
AS-tDR-011670	ENSMUST00000163582	Ptp4a3
AS-tDR-012690	ENSMUST00000112640	Steap3
AS-tDR-012690	ENSMUST00000080322	Oas1a
AS-tDR-012690 AS-tDR-013428	ENSMUST00000045224	Acer2
AS-tDR-012690	ENSMUST00000020957	Adi1
AS-tDR-011670 AS-tDR-012690 AS-tDR-013428	ENSMUST00000015449	Sash1
AS-tDR-013428	ENSMUST00000099294	Ablim1
AS-tDR-011670	ENSMUST00000045537	Chrm4
AS-tDR-011775	ENSMUST00000048718	Mmaa
AS-tDR-013428	ENSMUST00000065103	Mrpl35
AS-tDR-012690	ENSMUST00000167323	Apold1
AS-tDR-011775	ENSMUST00000061852	Dclre1c
AS-tDR-013428	ENSMUST00000063976	Opa3
AS-tDR-012690	ENSMUST00000046285	C1qa
AS-tDR-012690	ENSMUST00000053020	Neurl1b
AS-tDR-011775 AS-tDR-013428	ENSMUST00000066708	Dmp1
AS-tDR-005058	ENSMUST00000069180	Zcchc24
AS-tDR-011775	ENSMUST00000039205	Galm
AS-tDR-013428	ENSMUST00000151224	Fam163b
AS-tDR-012690	ENSMUST00000127748	Tril
AS-tDR-013428	ENSMUST00000109626	Cyld
AS-tDR-011670 AS-tDR-011775	ENSMUST00000045376	Adk
AS-tDR-011389 AS-tDR-011670	ENSMUST00000055738	Tsc22d3
AS-tDR-012690	ENSMUST00000024884	Eif2ak2
AS-tDR-012690	ENSMUST00000090287	Myh11
AS-tDR-005058	ENSMUST00000118009	Naf1
AS-tDR-010789 AS-tDR-013428 AS-tDR-01269	ENSMUST00000171588	Lifr
AS-tDR-005058	ENSMUST00000113975	Slc5a3
AS-tDR-013428	ENSMUST00000111194	Cd44
AS-tDR-005058	ENSMUST00000045756	S100a10
AS-tDR-011775	ENSMUST00000098822	Zfp606
AS-tDR-012690 AS-tDR-013428	ENSMUST00000169927	Adora1
AS-tDR-012690	ENSMUST00000060214	Tmem125
AS-tDR-010789 AS-tDR-012690	ENSMUST00000106252	Mycl
AS-tDR-012690	ENSMUST00000205741	Nelfb
AS-tDR-011389	ENSMUST00000087328	Hspa1a
AS-tDR-005058	ENSMUST00000002176	Celf2
AS-tDR-005058	ENSMUST00000105285	Epyc
AS-tDR-012690	ENSMUST00000106355	Zfp691
AS-tDR-011775 AS-tDR-013428	ENSMUST00000075304	Stx3
AS-tDR-011389	ENSMUST00000106635	Kcnj16
AS-tDR-005058	ENSMUST00000053308	Ranbp3l
AS-tDR-012690	ENSMUST00000002379	Cd320
AS-tDR-005058 AS-tDR-012690	ENSMUST00000040912	Anln
AS-tDR-012690	ENSMUST00000172815	Gm19345
AS-tDR-011775	ENSMUST00000112186	Mettl8
AS-tDR-011389	ENSMUST00000060716	Samd3
AS-tDR-011775 AS-tDR-012690	ENSMUST00000038423	Rtp4
AS-tDR-013428	ENSMUST00000020102	Slc17a8
AS-tDR-011389	ENSMUST00000032198	Usp18
AS-tDR-005058 AS-tDR-013428	ENSMUST00000032279	Erc1
AS-tDR-011389	ENSMUST00000072271	Etnppl
AS-tDR-011775	ENSMUST00000085668	Gm5113
AS-tDR-013428	ENSMUST00000057243	Tmem252
AS-tDR-012690	ENSMUST00000081982	Dzank1
AS-tDR-011389 AS-tDR-012690	ENSMUST00000068975	Zfp180
AS-tDR-011670	ENSMUST00000098230	Rhog
AS-tDR-005058 AS-tDR-011775	ENSMUST00000077687	Ccdc148
