# Supplementary material for: Identification of functional tRNA-derived fragments in senescence-accelerated mouse prone 8 brain
Source: Aging (Albany NY). 2019 Nov 20;11(22):10485–98. doi: 10.18632/aging.102471 (PMC6914438; doi:10.18632/aging.102471)
Supplement: Supplementary Table 3 [file aging-11-102471-s003..xlsx]

## Sheet: Table S4
Supplementary table 3 GO enrichment analysis of the tRFs-targeting genes
GO accession	Description	adjusted p value
GO:0005488	binding	9.63368e-12
GO:0009987	cellular process	7.02926e-11
GO:0005737	cytoplasm	7.02926e-11
GO:0005623	cell	1.6044e-10
GO:0044464	cell part	1.6044e-10
GO:0043226	organelle	1.66199e-10
GO:0044699	single-organism process	5.11122e-10
GO:0044424	intracellular part	1.21588e-09
GO:0043229	intracellular organelle	1.33876e-09
GO:0005622	intracellular	1.47705e-09
GO:0043227	membrane-bounded organelle	2.5191e-09
GO:0016020	membrane	2.90816e-09
GO:0065007	biological regulation	7.54182e-09
GO:0005515	protein binding	1.06246e-08
GO:0050789	regulation of biological process	1.12978e-08
GO:0044444	cytoplasmic part	2.25253e-08
GO:0043231	intracellular membrane-bounded organelle	3.36657e-08
GO:0044763	single-organism cellular process	4.72509e-08
GO:0060076	excitatory synapse	1.18944e-07
GO:0050896	response to stimulus	2.74024e-07
GO:1902578	single-organism localization	7.80717e-07
GO:0099572	postsynaptic specialization	7.80717e-07
GO:0014069	postsynaptic density	7.80717e-07
GO:0044456	synapse part	1.113e-06
GO:0044425	membrane part	2.36004e-06
GO:0008152	metabolic process	2.42575e-06
GO:0044765	single-organism transport	3.12808e-06
GO:0051179	localization	3.26027e-06
GO:0071704	organic substance metabolic process	4.304e-06
GO:0044238	primary metabolic process	7.31219e-06
GO:0071840	cellular component organization or biogenesis	7.74386e-06
GO:0032501	multicellular organismal process	8.5263e-06
GO:0016021	integral component of membrane	1.51359e-05
GO:0044237	cellular metabolic process	1.65959e-05
GO:0045202	synapse	1.75704e-05
GO:0044707	single-multicellular organism process	2.10428e-05
GO:0031224	intrinsic component of membrane	2.7244e-05
GO:0016043	cellular component organization	3.28013e-05
GO:0051234	establishment of localization	5.82518e-05
GO:0050794	regulation of cellular process	6.58827e-05
GO:0071944	cell periphery	6.78208e-05
GO:0006810	transport	9.08927e-05
GO:0003824	catalytic activity	9.22741e-05
GO:0098794	postsynapse	0.000112185
GO:0048518	positive regulation of biological process	0.000120916
GO:0005886	plasma membrane	0.000121196
GO:0048584	positive regulation of response to stimulus	0.000122445
GO:0071702	organic substance transport	0.000147776
GO:0042221	response to chemical	0.000147776
GO:0044260	cellular macromolecule metabolic process	0.000147776
GO:0044710	single-organism metabolic process	0.000152126
GO:0044459	plasma membrane part	0.00016792
GO:0033036	macromolecule localization	0.000167937
GO:0043170	macromolecule metabolic process	0.000172734
GO:0048731	system development	0.000191289
GO:0005773	vacuole	0.000191289
GO:0044700	single organism signaling	0.000191289
GO:0023052	signaling	0.000194183
GO:0048583	regulation of response to stimulus	0.00020298
GO:0007154	cell communication	0.000237139
GO:0097458	neuron part	0.000264179
GO:0012505	endomembrane system	0.000295956
GO:0030030	cell projection organization	0.000367791
GO:0051716	cellular response to stimulus	0.000423236
GO:0022008	neurogenesis	0.000443306
GO:0097060	synaptic membrane	0.000457414
GO:0048856	anatomical structure development	0.000457414
GO:0003008	system process	0.000461325
GO:0007275	multicellular organism development	0.000548502
GO:0046983	protein dimerization activity	0.000577189
GO:0051239	regulation of multicellular organismal process	0.000677565
GO:0007399	nervous system development	0.000689487
GO:0031175	neuron projection development	0.000746378
GO:0007267	cell-cell signaling	0.000776767
GO:0010647	positive regulation of cell communication	0.000780327
GO:0048699	generation of neurons	0.000789999
GO:0007165	signal transduction	0.000796339
GO:0023056	positive regulation of signaling	0.000796339
GO:0044281	small molecule metabolic process	0.000940652
GO:0030182	neuron differentiation	0.00102578
GO:0045211	postsynaptic membrane	0.00108957
GO:0044767	single-organism developmental process	0.00111014
GO:0010817	regulation of hormone levels	0.00122431
GO:0032502	developmental process	0.00131067
GO:1902253	regulation of intrinsic apoptotic signaling pathway by p53 class mediator	0.00142423
GO:0043412	macromolecule modification	0.00153459
GO:0031988	membrane-bounded vesicle	0.00153459
GO:0036211	protein modification process	0.00164473
GO:0006464	cellular protein modification process	0.00164473
GO:1901615	organic hydroxy compound metabolic process	0.00185514
GO:0032879	regulation of localization	0.00187263
GO:0031982	vesicle	0.00197769
GO:0098793	presynapse	0.00202982
GO:0072657	protein localization to membrane	0.00205784
GO:0032990	cell part morphogenesis	0.00207571
GO:0071705	nitrogen compound transport	0.0021347
GO:1901363	heterocyclic compound binding	0.00216695
GO:0048666	neuron development	0.00216695
GO:0006807	nitrogen compound metabolic process	0.00229193
GO:0008104	protein localization	0.00255997
GO:0005771	multivesicular body	0.00270834
GO:0097159	organic cyclic compound binding	0.00272587
GO:0007155	cell adhesion	0.00272771
GO:0044267	cellular protein metabolic process	0.00278997
GO:0022610	biological adhesion	0.00284367
GO:0098590	plasma membrane region	0.00306607
GO:0009967	positive regulation of signal transduction	0.00306607
GO:0007166	cell surface receptor signaling pathway	0.00316507
GO:0044802	single-organism membrane organization	0.0032207
GO:0043065	positive regulation of apoptotic process	0.00339653
GO:0051641	cellular localization	0.00342849
GO:0043068	positive regulation of programmed cell death	0.00356356
GO:0030544	Hsp70 protein binding	0.0038623
GO:0048522	positive regulation of cellular process	0.0041262
GO:0023061	signal release	0.00420703
GO:0048869	cellular developmental process	0.00432861
GO:0010646	regulation of cell communication	0.00432861
GO:0065008	regulation of biological quality	0.00437572
GO:1905114	cell surface receptor signaling pathway involved in cell-cell signaling	0.00464864
GO:0023051	regulation of signaling	0.00464864
GO:0031072	heat shock protein binding	0.00478079
GO:0010942	positive regulation of cell death	0.00502852
GO:0050877	neurological system process	0.00531122
GO:0032844	regulation of homeostatic process	0.00533194
GO:0001609	G-protein coupled adenosine receptor activity	0.00566633
GO:0019538	protein metabolic process	0.00586179
GO:0045184	establishment of protein localization	0.00606269
GO:0046879	hormone secretion	0.00609723
GO:0006950	response to stress	0.00611519
GO:0061024	membrane organization	0.00615872
GO:0002793	positive regulation of peptide secretion	0.00617249
GO:0048468	cell development	0.00617249
GO:0048858	cell projection morphogenesis	0.00620277
GO:0051649	establishment of localization in cell	0.00620328
GO:0072331	signal transduction by p53 class mediator	0.00620328
GO:0070062	extracellular exosome	0.00620328
GO:0009914	hormone transport	0.00628183
GO:0009628	response to abiotic stimulus	0.00628183
GO:1903561	extracellular vesicle	0.0064482
GO:0042447	hormone catabolic process	0.00648565
GO:0043230	extracellular organelle	0.00648565
GO:0036477	somatodendritic compartment	0.00675047
GO:0004872	receptor activity	0.00675047
GO:0060089	molecular transducer activity	0.00675047
GO:0099501	exocytic vesicle membrane	0.00677767
GO:0030672	synaptic vesicle membrane	0.00677767
GO:0070887	cellular response to chemical stimulus	0.00706164
GO:0097367	carbohydrate derivative binding	0.00770688
GO:0009966	regulation of signal transduction	0.00770688
GO:0030154	cell differentiation	0.00784216
GO:0006468	protein phosphorylation	0.00785266
GO:1901796	regulation of signal transduction by p53 class mediator	0.00785266
GO:0010467	gene expression	0.00793093
GO:0045785	positive regulation of cell adhesion	0.00795916
GO:0006812	cation transport	0.00797095
GO:0042312	regulation of vasodilation	0.00812294
GO:0044297	cell body	0.00819057
GO:0009058	biosynthetic process	0.00827439
GO:0006066	alcohol metabolic process	0.00837648
GO:0051967	negative regulation of synaptic transmission, glutamatergic	0.0085741
GO:0051085	chaperone mediated protein folding requiring cofactor	0.0085741
GO:0040011	locomotion	0.0085741
GO:0043167	ion binding	0.00874246
GO:0016055	Wnt signaling pathway	0.00943418
GO:0198738	cell-cell signaling by wnt	0.0095198
GO:0006915	apoptotic process	0.00974217
GO:0001973	adenosine receptor signaling pathway	0.00990481
GO:0090150	establishment of protein localization to membrane	0.00990481
