# Supplementary material for: Identification of functional tRNA-derived fragments in senescence-accelerated mouse prone 8 brain
Source: Aging (Albany NY). 2019 Nov 20;11(22):10485–98. doi: 10.18632/aging.102471 (PMC6914438; doi:10.18632/aging.102471)
Supplement: Supplementary Table 5 [file aging-11-102471-s001..xlsx]

## Sheet: Table S1
Supplementary table 5 Significantly and differentially expressed mRNA transcripts between SAMP8 and SAMR1 mice
transcript_id	gene_id	gene_name	length	SAMP8_FPKM	SAMR1_FPKM	log2(foldchange)	pvalue	Adjusted p value
ENSMUST00000024823	ENSMUSG00000024026	Glo1	1935	50.0226	113.402	-1.18079	5e-05	0.00895807
ENSMUST00000098519	ENSMUSG00000036712	Cyld	7954	33.7971	19.1444	0.819982	5e-05	0.00895807
ENSMUST00000025511	ENSMUSG00000024608	Rps14	683	1029.44	710.914	0.534109	5e-05	0.00895807
ENSMUST00000082407	ENSMUSG00000064356	mt-Atp8	204	19184.9	12216.9	0.651087	5e-05	0.00895807
ENSMUST00000022816	ENSMUSG00000022205	Sub1	3372	102.171	70.0828	0.543855	5e-05	0.00895807
ENSMUST00000022954	ENSMUSG00000022332	Khdrbs3	1887	125.893	97.9376	0.362262	5e-05	0.00895807
ENSMUST00000029632	ENSMUSG00000028003	Lrat	5351	0.878417	0.0857949	3.35594	5e-05	0.00895807
ENSMUST00000076922	ENSMUSG00000030921	Trim30a	3771	0.645472	1.19475	-0.88828	5e-05	0.00895807
ENSMUST00000072739	ENSMUSG00000064317	Gm10146	448	15.9499	6.18774	1.36606	5e-05	0.00895807
ENSMUST00000040402	ENSMUSG00000036398	Ppp1r11	1599	46.0024	30.988	0.569999	5e-05	0.00895807
ENSMUST00000189457	ENSMUSG00000101972	Hist1h3i	411	35.444	17.8487	0.989718	5e-05	0.00895807
ENSMUST00000025178	ENSMUSG00000024319	Vps52	3332	13.7885	9.3241	0.56443	5e-05	0.00895807
ENSMUST00000177591	ENSMUSG00000096768	Erdr1	776	9.41966	4.23912	1.15191	5e-05	0.00895807
ENSMUST00000090776	ENSMUSG00000071478	Hist1h2ad	463	7.03945	1.70679	2.04418	5e-05	0.00895807
ENSMUST00000110690	ENSMUSG00000022186	Oxct1	3527	178.117	85.0701	1.0661	5e-05	0.00895807
ENSMUST00000023779	ENSMUSG00000023034	Nr4a1	2474	17.55	25.4761	-0.537675	5e-05	0.00895807
ENSMUST00000188775	ENSMUSG00000101355	Hist1h3h	411	25.3941	12.1053	1.06886	5e-05	0.00895807
ENSMUST00000187994	ENSMUSG00000075602	Ly6a	955	10.0793	0.570602	4.14276	5e-05	0.00895807
ENSMUST00000026911	ENSMUSG00000025804	Ccr1	2831	0.105164	0.74094	-2.81672	5e-05	0.00895807
ENSMUST00000105046	ENSMUSG00000078249	Hmga1-rs1	1626	2.6375	6.28017	-1.25163	5e-05	0.00895807
ENSMUST00000081342	ENSMUSG00000094777	Hist1h2ap	482	8.19827	3.39358	1.27251	5e-05	0.00895807
ENSMUST00000011407	ENSMUSG00000011263	Exoc3l2	2201	0.139825	0.622708	-2.15493	5e-05	0.00895807
ENSMUST00000102983	ENSMUSG00000064288	Hist1h4k	312	270.927	173.858	0.639999	5e-05	0.00895807
ENSMUST00000086545	ENSMUSG00000033966	Cdkl4	2931	9.65715	5.08034	0.926672	5e-05	0.00895807
ENSMUST00000128727	ENSMUSG00000056367	Actr3b	2031	36.5892	18.3164	0.998284	5e-05	0.00895807
ENSMUST00000122452	ENSMUSG00000031698	Mylk3	3036	1.0389	0.210241	2.30495	5e-05	0.00895807
ENSMUST00000064391	ENSMUSG00000052560	Cpne8	3366	4.41192	6.39133	-0.534708	5e-05	0.00895807
ENSMUST00000116527	ENSMUSG00000047844	Bex4	837	19.359	9.10215	1.08872	5e-05	0.00895807
ENSMUST00000024572	ENSMUSG00000023806	Rsph3b	1614	1.14776	0.455806	1.33233	5e-05	0.00895807
ENSMUST00000186219	ENSMUSG00000072774	Zfp951	2904	0.193768	0.772844	-1.99585	5e-05	0.00895807
ENSMUST00000088940	ENSMUSG00000038141	Tmem181a	4405	35.846	46.9413	-0.389045	5e-05	0.00895807
ENSMUST00000099683	ENSMUSG00000075014	Gm10800	665	15.3198	29.44	-0.942385	5e-05	0.00895807
ENSMUST00000064659	ENSMUSG00000052676	Zmat1	3501	2.53976	3.56726	-0.490126	5e-05	0.00895807
ENSMUST00000113211	ENSMUSG00000079435	Rpl36a	483	565.82	419.727	0.430891	5e-05	0.00895807
ENSMUST00000076038	ENSMUSG00000038048	Cntnap5c	3918	2.27111	3.458	-0.606537	5e-05	0.00895807
ENSMUST00000135562	ENSMUSG00000030235	Slco1c1	2680	9.55078	18.3024	-0.938342	5e-05	0.00895807
ENSMUST00000102518	ENSMUSG00000057530	Ece1	4816	8.32631	5.85623	0.507705	5e-05	0.00895807
ENSMUST00000090781	ENSMUSG00000068854	Hist2h2be	2620	2.97658	1.95352	0.607583	5e-05	0.00895807
ENSMUST00000090782	ENSMUSG00000068855	Hist2h2ac	520	43.4868	15.9693	1.44528	5e-05	0.00895807
ENSMUST00000087342	ENSMUSG00000067288	Rps28	392	409.217	183.895	1.15398	5e-05	0.00895807
ENSMUST00000099703	ENSMUSG00000075031	Hist1h2bb	452	42.8692	23.5081	0.866785	5e-05	0.00895807
ENSMUST00000075312	ENSMUSG00000061808	Ttr	1219	226.713	147.489	0.620263	5e-05	0.00895807
ENSMUST00000001845	ENSMUSG00000001794	Capns1	1546	26.5548	1.99036	3.73787	5e-05	0.00895807
ENSMUST00000057885	ENSMUSG00000047215	Rpl9	738	957.42	748.437	0.355271	5e-05	0.00895807
ENSMUST00000106602	ENSMUSG00000057322	Rpl38	371	2596.25	1457.88	0.832554	5e-05	0.00895807
ENSMUST00000024706	ENSMUSG00000023913	Pla2g7	2097	60.0375	40.3662	0.572718	5e-05	0.00895807
ENSMUST00000178401	ENSMUSG00000095325	Zfp870	5126	2.97818	1.67623	0.829213	5e-05	0.00895807
ENSMUST00000057272	ENSMUSG00000037270	4932438A13Rik	15883	3.8288	20.4437	-2.41669	5e-05	0.00895807
ENSMUST00000108995	ENSMUSG00000089951	Gm14435	643	12.1125	7.17816	0.754815	5e-05	0.00895807
ENSMUST00000084434	ENSMUSG00000025508	Rplp2	964	68.3132	43.1456	0.662951	5e-05	0.00895807
ENSMUST00000056549	ENSMUSG00000047603	Zfp235	3373	8.18825	5.23896	0.644276	5e-05	0.00895807
ENSMUST00000028199	ENSMUSG00000026848	Tor1b	3039	3.77139	7.38624	-0.969743	5e-05	0.00895807
ENSMUST00000153941	ENSMUSG00000044712	Slc38a6	3927	47.7476	80.042	-0.745331	5e-05	0.00895807
ENSMUST00000028350	ENSMUSG00000026974	Zmynd19	3903	6.76252	3.21118	1.07446	5e-05	0.00895807
ENSMUST00000024811	ENSMUSG00000024014	Pim1	2638	2.32656	1.31343	0.824866	5e-05	0.00895807
ENSMUST00000191124	ENSMUSG00000023826	Park2	3202	1.91014	4.69131	-1.29632	5e-05	0.00895807
ENSMUST00000020024	ENSMUSG00000019874	Fabp7	804	67.6485	31.663	1.09526	5e-05	0.00895807
ENSMUST00000076505	ENSMUSG00000060224	Pyroxd2	3119	0.279033	0.87761	-1.65314	5e-05	0.00895807
ENSMUST00000010506	ENSMUSG00000010362	Rdm1	1124	4.55511	2.62492	0.795213	5e-05	0.00895807
ENSMUST00000029270	ENSMUSG00000027715	Ccna2	2965	0.445714	2.15425	-2.273	5e-05	0.00895807
ENSMUST00000060792	ENSMUSG00000004044	Ptrf	3491	4.1825	2.91016	0.523265	5e-05	0.00895807
ENSMUST00000192145	ENSMUSG00000028080	Lrba	8843	2.17909	6.32824	-1.53808	5e-05	0.00895807
ENSMUST00000135915	ENSMUSG00000047617	BC029214	896	4.34171	14.4895	-1.73867	5e-05	0.00895807
ENSMUST00000006669	ENSMUSG00000006494	Pdk1	5185	20.2782	9.89082	1.03577	5e-05	0.00895807
ENSMUST00000102824	ENSMUSG00000034459	Ifit1	2656	1.33718	3.1783	-1.24907	5e-05	0.00895807
ENSMUST00000102825	ENSMUSG00000074896	Ifit3	1745	5.01947	11.1151	-1.14692	5e-05	0.00895807
ENSMUST00000116304	ENSMUSG00000038642	Ctss	1355	54.1345	84.2908	-0.638828	5e-05	0.00895807
ENSMUST00000164960	ENSMUSG00000030134	Rasgef1a	3284	95.4798	69.075	0.467031	5e-05	0.00895807
ENSMUST00000165532	ENSMUSG00000025794	Rpl14	935	386.13	298.032	0.373617	5e-05	0.00895807
ENSMUST00000068045	ENSMUSG00000054808	Actn4	3877	10.1006	6.08247	0.731706	5e-05	0.00895807
ENSMUST00000062387	ENSMUSG00000038026	Kcnj9	3857	34.6862	24.6209	0.494482	5e-05	0.00895807
ENSMUST00000067230	ENSMUSG00000076431	Sox4	4795	6.33906	4.69718	0.432474	5e-05	0.00895807
ENSMUST00000063704	ENSMUSG00000078496	Gm13152	1244	0.661579	2.02632	-1.61488	5e-05	0.00895807
ENSMUST00000073471	ENSMUSG00000060938	Rpl26	526	142.185	79.8311	0.832747	5e-05	0.00895807
ENSMUST00000068261	ENSMUSG00000024403	Atp6v1g2	1528	82.6508	118.232	-0.516518	5e-05	0.00895807
ENSMUST00000109815	ENSMUSG00000057897	Camk2b	3780	10.9686	34.3965	-1.64888	5e-05	0.00895807
ENSMUST00000020203	ENSMUSG00000020018	Snrpf	861	14.9396	9.87893	0.59671	5e-05	0.00895807
ENSMUST00000047309	ENSMUSG00000035285	Nat14	1612	34.4706	23.8487	0.53146	5e-05	0.00895807
ENSMUST00000191829	ENSMUSG00000102692	Dchs2	10783	0.795445	1.32785	-0.739261	5e-05	0.00895807
ENSMUST00000102852	ENSMUSG00000050737	Ptges	3647	0.338866	1.20911	-1.83516	5e-05	0.00895807
ENSMUST00000069803	ENSMUSG00000089996	Tmsb15b2	450	15.627	5.24189	1.57588	5e-05	0.00895807
ENSMUST00000053218	ENSMUSG00000048826	Dact2	2808	16.772	9.92186	0.757376	5e-05	0.00895807
ENSMUST00000102965	ENSMUSG00000069266	Hist1h4b	397	127.671	36.6713	1.79971	5e-05	0.00895807
ENSMUST00000108205	ENSMUSG00000059975	Zfp74	3944	3.83711	2.23966	0.776741	5e-05	0.00895807
ENSMUST00000035269	ENSMUSG00000032648	Pygm	2874	7.42257	5.12879	0.533299	5e-05	0.00895807
ENSMUST00000069562	ENSMUSG00000055826	Tescl	855	0	0.491423	#NAME?	5e-05	0.00895807
ENSMUST00000002452	ENSMUSG00000002379	Ndufa11	2661	29.7707	19.3869	0.618811	5e-05	0.00895807
ENSMUST00000028259	ENSMUSG00000026896	Ifih1	5470	0.531701	1.25998	-1.24471	5e-05	0.00895807
ENSMUST00000045604	ENSMUSG00000036850	Mrpl41	776	76.6941	42.9551	0.836288	5e-05	0.00895807
ENSMUST00000117242	ENSMUSG00000034109	Golim4	4551	2.85628	4.78613	-0.744723	5e-05	0.00895807
ENSMUST00000087675	ENSMUSG00000030225	Dera	1729	0.910446	2.084	-1.19471	5e-05	0.00895807
ENSMUST00000026420	ENSMUSG00000025362	Rps26	447	623	348.463	0.838227	5e-05	0.00895807
ENSMUST00000105590	ENSMUSG00000019768	Esr1	6339	1.03891	0.637816	0.703859	5e-05	0.00895807
ENSMUST00000045356	ENSMUSG00000041841	Rpl37	867	612.114	434.803	0.493437	5e-05	0.00895807
ENSMUST00000079085	ENSMUSG00000062006	Rpl34	480	351.436	200.756	0.807818	5e-05	0.00895807
ENSMUST00000053458	ENSMUSG00000050545	Fam228b	2886	5.98332	4.40112	0.443075	5e-05	0.00895807
ENSMUST00000050918	ENSMUSG00000046447	Camk2n1	4444	409.262	301.59	0.440433	5e-05	0.00895807
ENSMUST00000030765	ENSMUSG00000028927	Padi2	4774	3.29279	6.17897	-0.908057	5e-05	0.00895807
ENSMUST00000065408	ENSMUSG00000079018	Ly6c1	844	34.4297	66.6129	-0.952148	5e-05	0.00895807
ENSMUST00000077787	ENSMUSG00000053985	Zfp14	1506	8.45533	5.1465	0.716268	5e-05	0.00895807
ENSMUST00000174193	ENSMUSG00000032517	Mobp	2609	144.755	217.097	-0.584727	5e-05	0.00895807
ENSMUST00000025163	ENSMUSG00000024309	Pfdn6	807	77.8158	52.1912	0.576256	5e-05	0.00895807
ENSMUST00000062181	ENSMUSG00000037029	Zfp146	2024	22.7774	14.0409	0.697971	5e-05	0.00895807
ENSMUST00000123296	ENSMUSG00000030869	Ndufab1	1416	18.9984	10.349	0.876384	5e-05	0.00895807
ENSMUST00000080492	ENSMUSG00000057863	Rpl36	404	831.445	462.5	0.846167	5e-05	0.00895807
ENSMUST00000003416	ENSMUSG00000048440	Cyp4f16	2227	0.285478	0.834223	-1.54705	5e-05	0.00895807
ENSMUST00000162772	ENSMUSG00000030226	Lmo3	3664	29.6863	17.9986	0.721911	5e-05	0.00895807
ENSMUST00000162170	ENSMUSG00000030329	Pianp	2053	5.48344	10.2089	-0.896678	5e-05	0.00895807
ENSMUST00000036370	ENSMUSG00000033450	Tagap	3076	4.1425	2.4618	0.750787	5e-05	0.00895807
ENSMUST00000006618	ENSMUSG00000028919	Arhgef19	3414	0.783136	0.346706	1.17555	5e-05	0.00895807
ENSMUST00000172753	ENSMUSG00000090877	Hspa1b	2803	5.44805	2.96057	0.879865	5e-05	0.00895807
ENSMUST00000140119	ENSMUSG00000028626	Col9a2	752	5.69885	1.9733	1.53006	5e-05	0.00895807
ENSMUST00000059980	ENSMUSG00000046330	Rpl37a	584	1227.26	862.615	0.508656	5e-05	0.00895807
ENSMUST00000170122	ENSMUSG00000090733	Rps27	345	5085.51	2497.72	1.02578	5e-05	0.00895807
ENSMUST00000057486	ENSMUSG00000048307	Ankrd46	2480	76.1436	53.5047	0.509057	5e-05	0.00895807
ENSMUST00000034121	ENSMUSG00000005142	Man2b1	4325	5.17849	7.79428	-0.589883	5e-05	0.00895807
ENSMUST00000043722	ENSMUSG00000033880	Lgals3bp	2330	2.73436	4.20082	-0.619466	5e-05	0.00895807
ENSMUST00000022239	ENSMUSG00000021725	Parp8	3088	7.81983	5.13526	0.6067	5e-05	0.00895807
ENSMUST00000034713	ENSMUSG00000032193	Ldlr	4531	3.58401	5.0097	-0.483149	5e-05	0.00895807
ENSMUST00000059650	ENSMUSG00000043659	Npsr1	3791	2.3859	1.00276	1.25057	5e-05	0.00895807
ENSMUST00000105813	ENSMUSG00000041241	Mul1	3944	9.2843	5.84903	0.666595	5e-05	0.00895807
ENSMUST00000035813	ENSMUSG00000032827	Ppp1r9a	9547	19.7786	61.7864	-1.64335	5e-05	0.00895807
ENSMUST00000206362	ENSMUSG00000074283	Zfp109	2932	2.59908	0.608645	2.09433	5e-05	0.00895807
ENSMUST00000093209	ENSMUSG00000069919	Hba-a1	699	44.6598	18.7312	1.25354	5e-05	0.00895807
ENSMUST00000030432	ENSMUSG00000028672	Hmgcl	1418	8.22921	13.7653	-0.742205	5e-05	0.00895807
ENSMUST00000030029	ENSMUSG00000028344	Invs	5633	2.21109	5.77711	-1.38559	5e-05	0.00895807
ENSMUST00000029649	ENSMUSG00000028015	Ctso	3468	10.4101	6.01591	0.791133	5e-05	0.00895807
ENSMUST00000133544	ENSMUSG00000026848	Tor1b	4775	2.84898	4.49202	-0.656917	5e-05	0.00895807
ENSMUST00000098780	ENSMUSG00000074358	Ccdc61	2022	2.03734	0.806223	1.33744	5e-05	0.00895807
ENSMUST00000035775	ENSMUSG00000035215	Lsm7	468	183.969	130.09	0.499949	5e-05	0.00895807
ENSMUST00000052867	ENSMUSG00000050299	Gm9843	504	22.1659	7.98555	1.47288	5e-05	0.00895807
ENSMUST00000052865	ENSMUSG00000050912	Tmem123	2907	4.1258	5.8852	-0.512416	5e-05	0.00895807
ENSMUST00000028200	ENSMUSG00000026849	Tor1a	1401	8.4235	12.7569	-0.59879	5e-05	0.00895807
ENSMUST00000042035	ENSMUSG00000034730	Adgrb1	6228	11.3787	19.274	-0.760319	5e-05	0.00895807
ENSMUST00000038108	ENSMUSG00000037152	Ndufc1	1249	25.2393	14.6949	0.780356	5e-05	0.00895807
ENSMUST00000102476	ENSMUSG00000060802	B2m	860	64.6002	86.9981	-0.429444	5e-05	0.00895807
ENSMUST00000041649	ENSMUSG00000045027	Prss22	1323	0.213449	3.77715	-4.14533	5e-05	0.00895807
ENSMUST00000027343	ENSMUSG00000026158	Ogfrl1	4844	28.857	40.542	-0.490495	5e-05	0.00895807
ENSMUST00000079251	ENSMUSG00000058385	Hist1h2bg	477	71.6199	39.9155	0.843413	5e-05	0.00895807
ENSMUST00000150650	ENSMUSG00000095362	Gm14325	310	212.21	91.5017	1.21362	5e-05	0.00895807
ENSMUST00000076364	ENSMUSG00000058443	Rpl10-ps3	742	3.55259	1.30039	1.44992	5e-05	0.00895807
ENSMUST00000170872	ENSMUSG00000023885	Thbs2	5922	2.39406	3.53725	-0.563166	5e-05	0.00895807
ENSMUST00000051386	ENSMUSG00000038775	Vill	2909	1.22209	0.107622	3.50531	5e-05	0.00895807
ENSMUST00000076373	ENSMUSG00000063696	Gm8730	1075	9.0201	14.2366	-0.658394	5e-05	0.00895807
ENSMUST00000078804	ENSMUSG00000060636	Rpl35a	491	266.723	119.589	1.15726	5e-05	0.00895807
ENSMUST00000076941	ENSMUSG00000033222	Ttf2	4541	0.540211	0.217241	1.31423	5e-05	0.00895807
ENSMUST00000050433	ENSMUSG00000031997	Trpc6	3029	22.0241	4.3683	2.33394	5e-05	0.00895807
ENSMUST00000035105	ENSMUSG00000032518	Rpsa	1861	261.72	106.416	1.2983	5e-05	0.00895807
ENSMUST00000051867	ENSMUSG00000031683	Lsm6	2107	12.2025	6.79629	0.84436	5e-05	0.00895807
ENSMUST00000042360	ENSMUSG00000039676	Capsl	946	4.85154	2.15152	1.17308	5e-05	0.00895807
ENSMUST00000118012	ENSMUSG00000078877	Gm14295	1213	37.7303	27.0797	0.47851	5e-05	0.00895807
ENSMUST00000161741	ENSMUSG00000038690	Atp5j2	955	167.063	95.2071	0.811253	5e-05	0.00895807
ENSMUST00000092227	ENSMUSG00000069539	Scyl2	3566	6.27475	2.8119	1.15801	5e-05	0.00895807
ENSMUST00000042844	ENSMUSG00000041120	Nbl1	1793	23.6012	14.7838	0.674844	5e-05	0.00895807
ENSMUST00000028403	ENSMUSG00000027015	Cybrd1	5339	0.694289	0.119441	2.53923	5e-05	0.00895807
ENSMUST00000021719	ENSMUSG00000021290	2010107E04Rik	365	1704.12	1109.23	0.619465	5e-05	0.00895807
ENSMUST00000065678	ENSMUSG00000053317	Sec61b	564	50.4096	21.7952	1.20969	5e-05	0.00895807
ENSMUST00000105106	ENSMUSG00000069268	Hist1h2bf	461	13.8448	7.33599	0.916277	5e-05	0.00895807
ENSMUST00000016396	ENSMUSG00000016252	Atp5e	421	659.236	425.563	0.631425	5e-05	0.00895807
ENSMUST00000066070	ENSMUSG00000053565	Eif3k	773	149.591	111.681	0.421644	5e-05	0.00895807
ENSMUST00000067556	ENSMUSG00000044906	4930503L19Rik	2291	1.81545	3.55097	-0.967881	5e-05	0.00895807
ENSMUST00000032796	ENSMUSG00000011427	Zfp790	4525	6.94077	3.86694	0.843903	5e-05	0.00895807
ENSMUST00000159879	ENSMUSG00000018199	Trove2	8738	23.135	17.4794	0.40442	5e-05	0.00895807
ENSMUST00000148810	ENSMUSG00000026483	Fam129a	6531	0.372165	0.682388	-0.87465	5e-05	0.00895807
ENSMUST00000029722	ENSMUSG00000028081	Rps3a1	977	568.967	127.274	2.1604	5e-05	0.00895807
ENSMUST00000112640	ENSMUSG00000026389	Steap3	2752	1.08244	0.460961	1.23157	5e-05	0.00895807
ENSMUST00000102982	ENSMUSG00000069308	Hist1h2bp	469	8.87623	4.03283	1.13816	5e-05	0.00895807
ENSMUST00000047687	ENSMUSG00000041608	Entpd3	3444	3.371	2.13224	0.660808	5e-05	0.00895807
ENSMUST00000113711	ENSMUSG00000039715	Wdr34	1814	18.698	11.8589	0.656909	5e-05	0.00895807
ENSMUST00000091756	ENSMUSG00000094338	Hist1h2bl	381	61.2651	33.0844	0.888913	5e-05	0.00895807
ENSMUST00000048915	ENSMUSG00000038374	Rbm8a	2608	10.5087	5.92786	0.825994	5e-05	0.00895807
ENSMUST00000183125	ENSMUSG00000042063	Zfp386	4779	5.26037	0.558041	3.23672	5e-05	0.00895807
ENSMUST00000030372	ENSMUSG00000028626	Col9a2	2924	2.36694	1.49336	0.664457	5e-05	0.00895807
ENSMUST00000028241	ENSMUSG00000026880	Stom	2787	2.01639	4.99462	-1.3086	5e-05	0.00895807
ENSMUST00000119103	ENSMUSG00000032066	Bco2	2118	0.858622	1.58397	-0.883452	5e-05	0.00895807
ENSMUST00000045224	ENSMUSG00000038007	Acer2	4216	2.02277	4.52223	-1.1607	5e-05	0.00895807
ENSMUST00000037134	ENSMUSG00000040424	Hipk4	2926	5.79172	8.54023	-0.560282	5e-05	0.00895807
ENSMUST00000028239	ENSMUSG00000026879	Gsn	2653	7.34721	13.095	-0.833745	5e-05	0.00895807
ENSMUST00000020957	ENSMUSG00000020629	Adi1	1652	8.36156	4.77546	0.808132	5e-05	0.00895807
ENSMUST00000040907	ENSMUSG00000036775	Decr2	2187	20.4667	9.6629	1.08275	5e-05	0.00895807
ENSMUST00000015449	ENSMUSG00000015305	Sash1	7183	7.87588	5.85806	0.427017	5e-05	0.00895807
ENSMUST00000099294	ENSMUSG00000025085	Ablim1	6232	10.9835	17.1213	-0.640452	5e-05	0.00895807
ENSMUST00000028332	ENSMUSG00000026958	Dpp7	1682	8.20839	13.3786	-0.704755	5e-05	0.00895807
ENSMUST00000078369	ENSMUSG00000061615	Hist1h2ab	473	12.5317	6.07962	1.04352	5e-05	0.00895807
ENSMUST00000015664	ENSMUSG00000028111	Ctsk	1512	1.77449	3.06485	-0.788415	5e-05	0.00895807
ENSMUST00000030851	ENSMUSG00000028998	Tomm7	1125	99.8208	75.0091	0.412275	5e-05	0.00895807
ENSMUST00000179734	ENSMUSG00000095779	Gm2163	2723	13.13	17.8309	-0.441511	5e-05	0.00895807
ENSMUST00000102977	ENSMUSG00000060639	Hist1h4i	727	105.731	68.5888	0.62435	5e-05	0.00895807
ENSMUST00000037820	ENSMUSG00000038422	Hdhd3	1205	9.46883	6.06538	0.642588	5e-05	0.00895807
ENSMUST00000102972	ENSMUSG00000060981	Hist1h4h	473	652.241	397.655	0.713886	5e-05	0.00895807
ENSMUST00000027271	ENSMUSG00000026102	Inpp1	5767	3.21345	5.61024	-0.803942	5e-05	0.00895807
ENSMUST00000102971	ENSMUSG00000069274	Hist1h4f	391	279.013	189.5	0.558133	5e-05	0.00895807
ENSMUST00000029183	ENSMUSG00000027654	Fam83d	2266	0.537131	1.2313	-1.19684	5e-05	0.00895807
ENSMUST00000055071	ENSMUSG00000079017	Ifi27l2a	463	3.57924	20.3631	-2.50823	5e-05	0.00895807
ENSMUST00000102979	ENSMUSG00000069305	Hist1h4n	430	407.973	216.772	0.912295	5e-05	0.00895807
ENSMUST00000042665	ENSMUSG00000034422	Parp14	7417	0.352579	0.603346	-0.775039	5e-05	0.00895807
ENSMUST00000135776	ENSMUSG00000046079	Lrrc8d	5736	1.49413	3.55164	-1.24918	5e-05	0.00895807
ENSMUST00000194649	ENSMUSG00000039221	Rpl22l1	525	183.389	14.9086	3.62069	5e-05	0.00895807
ENSMUST00000025572	ENSMUSG00000024670	Cd6	2173	0.414124	1.13289	-1.45187	5e-05	0.00895807
ENSMUST00000113599	ENSMUSG00000056492	Adgrf5	8535	2.37509	3.52314	-0.56888	5e-05	0.00895807
ENSMUST00000205671	ENSMUSG00000030604	Zfp626	5329	5.21657	3.86224	0.433664	5e-05	0.00895807
ENSMUST00000127027	ENSMUSG00000096696	Zfp960	2667	1.21942	2.16247	-0.826482	5e-05	0.00895807
ENSMUST00000009039	ENSMUSG00000058600	Rpl30	570	212.942	128.633	0.727199	5e-05	0.00895807
ENSMUST00000022751	ENSMUSG00000022151	Ttc33	1832	36.6084	17.3615	1.07629	5e-05	0.00895807
ENSMUST00000187028	ENSMUSG00000099689	Zfp383	3208	3.20396	1.4682	1.12581	5e-05	0.00895807
ENSMUST00000030538	ENSMUSG00000028757	Ddost	2120	46.4563	34.9394	0.411021	5e-05	0.00895807
ENSMUST00000048718	ENSMUSG00000037022	Mmaa	2843	7.73067	5.73656	0.430409	5e-05	0.00895807
ENSMUST00000142555	ENSMUSG00000069919	Hba-a1	494	249.843	143.494	0.800036	5e-05	0.00895807
ENSMUST00000089430	ENSMUSG00000068240	Gm11808	504	8.4874	3.8649	1.13489	5e-05	0.00895807
ENSMUST00000065103	ENSMUSG00000052962	Mrpl35	3721	5.92122	1.78235	1.73211	5e-05	0.00895807
ENSMUST00000097992	ENSMUSG00000038368	Focad	5791	10.508	17.0206	-0.695788	5e-05	0.00895807
ENSMUST00000118193	ENSMUSG00000022151	Ttc33	1671	17.8915	37.3801	-1.06299	5e-05	0.00895807
ENSMUST00000167323	ENSMUSG00000090698	Apold1	3567	1.67313	2.74567	-0.714606	5e-05	0.00895807
ENSMUST00000061852	ENSMUSG00000026648	Dclre1c	7075	0.227636	0.887767	-1.96345	5e-05	0.00895807
ENSMUST00000023934	ENSMUSG00000052305	Hbb-bs	778	139.116	44.4335	1.64657	5e-05	0.00895807
ENSMUST00000063976	ENSMUSG00000052214	Opa3	3366	17.54	12.2107	0.522506	5e-05	0.00895807
ENSMUST00000078034	ENSMUSG00000062456	Rpl9-ps6	691	12.8409	4.25318	1.59413	5e-05	0.00895807
ENSMUST00000087605	ENSMUSG00000024300	Myo1f	3819	0.610911	1.05402	-0.786869	5e-05	0.00895807
ENSMUST00000046285	ENSMUSG00000036887	C1qa	1040	35.8171	55.1394	-0.622437	5e-05	0.00895807
ENSMUST00000053020	ENSMUSG00000034413	Neurl1b	6195	11.0395	7.73735	0.512759	5e-05	0.00895807
ENSMUST00000066708	ENSMUSG00000029307	Dmp1	2764	0.366427	0.94718	-1.37011	5e-05	0.00895807
ENSMUST00000108429	ENSMUSG00000040952	Rps19	633	319.416	167.407	0.932082	5e-05	0.00895807
ENSMUST00000028470	ENSMUSG00000027076	Timm10	690	40.2998	29.5209	0.449035	5e-05	0.00895807
ENSMUST00000030401	ENSMUSG00000028648	Ndufs5	525	294.022	224.207	0.391092	5e-05	0.00895807
ENSMUST00000039205	ENSMUSG00000035473	Galm	2314	0.717184	1.48842	-1.05337	5e-05	0.00895807
ENSMUST00000151224	ENSMUSG00000009216	Fam163b	2959	9.44443	13.1439	-0.47686	5e-05	0.00895807
ENSMUST00000165033	ENSMUSG00000038418	Egr1	3036	26.2421	39.8109	-0.60128	5e-05	0.00895807
ENSMUST00000109626	ENSMUSG00000036712	Cyld	7945	4.02991	13.7088	-1.76628	5e-05	0.00895807
ENSMUST00000186475	ENSMUSG00000099689	Zfp383	2614	2.11192	1.00307	1.07413	5e-05	0.00895807
ENSMUST00000069507	ENSMUSG00000073418	C4b	5379	5.28792	3.60957	0.550876	5e-05	0.00895807
ENSMUST00000040824	ENSMUSG00000042737	Dpm3	404	114.641	74.8697	0.614674	5e-05	0.00895807
ENSMUST00000058210	ENSMUSG00000015766	Eps8	4567	2.56078	6.32752	-1.30505	5e-05	0.00895807
ENSMUST00000164044	ENSMUSG00000059498	Fcgr3	1347	5.6977	9.04075	-0.666063	5e-05	0.00895807
ENSMUST00000114020	ENSMUSG00000052406	Rexo4	2278	19.2931	13.9905	0.463635	5e-05	0.00895807
ENSMUST00000069486	ENSMUSG00000055760	Gemin6	1134	5.91072	3.52901	0.744069	5e-05	0.00895807
ENSMUST00000006397	ENSMUSG00000006235	Epor	1829	2.92082	1.70144	0.779614	5e-05	0.00895807
ENSMUST00000167969	ENSMUSG00000090963	Gm17655	255	78.2862	23.3409	1.74589	5e-05	0.00895807
ENSMUST00000024832	ENSMUSG00000024033	Rsph1	1164	1.5924	3.99338	-1.32641	5e-05	0.00895807
ENSMUST00000055738	ENSMUSG00000031431	Tsc22d3	1974	25.3661	42.3212	-0.73848	5e-05	0.00895807
ENSMUST00000074455	ENSMUSG00000066838	Zfp772	2772	2.32771	4.6155	-0.987576	5e-05	0.00895807
ENSMUST00000027931	ENSMUSG00000026622	Nek2	3227	0.550049	0.110751	2.31224	5e-05	0.00895807
ENSMUST00000024884	ENSMUSG00000024079	Eif2ak2	4313	2.03069	3.02105	-0.573084	5e-05	0.00895807
ENSMUST00000104998	ENSMUSG00000078201	Tmem203	854	9.4241	17.9501	-0.929565	5e-05	0.00895807
ENSMUST00000051672	ENSMUSG00000046718	Bst2	764	1.21302	3.73873	-1.62395	5e-05	0.00895807
ENSMUST00000082411	ENSMUSG00000064360	mt-Nd3	348	2470.25	1085.54	1.18624	5e-05	0.00895807
ENSMUST00000061688	ENSMUSG00000036552	Ermard	2120	5.91017	2.13401	1.46963	5e-05	0.00895807
ENSMUST00000086006	ENSMUSG00000087598	Zfp111	6402	1.57485	0.85891	0.874635	5e-05	0.00895807
ENSMUST00000032696	ENSMUSG00000055305	Zfp93	2324	4.58769	1.91569	1.2599	5e-05	0.00895807
ENSMUST00000076249	ENSMUSG00000062488	Ifit3b	2000	1.94827	3.80832	-0.966963	5e-05	0.00895807
ENSMUST00000090287	ENSMUSG00000018830	Myh11	6632	1.64878	2.55992	-0.634703	5e-05	0.00895807
ENSMUST00000111518	ENSMUSG00000040181	Fmo1	1506	8.70814	29.6668	-1.76841	5e-05	0.00895807
ENSMUST00000144826	ENSMUSG00000023087	Noct	9797	19.8229	34.4388	-0.796866	5e-05	0.00895807
ENSMUST00000118009	ENSMUSG00000014907	Naf1	2990	3.71575	2.35546	0.657644	5e-05	0.00895807
ENSMUST00000171588	ENSMUSG00000054263	Lifr	9655	10.7193	6.19771	0.790399	5e-05	0.00895807
ENSMUST00000103146	ENSMUSG00000071415	Rpl23	1059	269.016	183.122	0.554883	5e-05	0.00895807
ENSMUST00000179285	ENSMUSG00000096010	Hist4h4	2863	25.7768	19.0595	0.435559	5e-05	0.00895807
ENSMUST00000090746	ENSMUSG00000027875	Hmgcs2	3290	3.94851	2.58729	0.609868	5e-05	0.00895807
ENSMUST00000066489	ENSMUSG00000006931	P3h4	2178	8.39034	4.12607	1.02396	5e-05	0.00895807
ENSMUST00000082396	ENSMUSG00000064345	mt-Nd2	1038	563.843	435.064	0.374067	5e-05	0.00895807
ENSMUST00000179505	ENSMUSG00000095041	PISD	2373	39.8585	9.28562	2.10182	5e-05	0.00895807
ENSMUST00000045756	ENSMUSG00000041959	S100a10	685	48.5343	31.6277	0.617816	5e-05	0.00895807
ENSMUST00000055296	ENSMUSG00000049553	Polr1a	9216	2.17232	0.869029	1.32176	5e-05	0.00895807
ENSMUST00000150108	ENSMUSG00000013593	Ndufs2	662	130.327	8.94722	3.86455	5e-05	0.00895807
ENSMUST00000043870	ENSMUSG00000038489	Polr2l	1650	24.5994	17.0954	0.525012	5e-05	0.00895807
ENSMUST00000063683	ENSMUSG00000052031	Tagap1	2358	6.89182	13.2426	-0.942233	5e-05	0.00895807
ENSMUST00000023994	ENSMUSG00000023224	Serping1	1768	1.65432	2.74343	-0.729742	5e-05	0.00895807
ENSMUST00000044681	ENSMUSG00000035199	Arl6ip5	1442	85.995	60.9559	0.496488	5e-05	0.00895807
ENSMUST00000187126	ENSMUSG00000093803	Ppp2r3d	254	94.1352	25.4388	1.8877	5e-05	0.00895807
ENSMUST00000098822	ENSMUSG00000030386	Zfp606	4748	4.02061	2.30501	0.802641	5e-05	0.00895807
ENSMUST00000180180	ENSMUSG00000066839	Ecsit	1676	3.55188	10.5888	-1.57588	5e-05	0.00895807
ENSMUST00000113071	ENSMUSG00000089768	Tmsb15b1	439	12.4684	3.05487	2.02909	5e-05	0.00895807
ENSMUST00000020145	ENSMUSG00000019970	Sgk1	2456	26.657	44.8449	-0.750429	5e-05	0.00895807
ENSMUST00000075602	ENSMUSG00000070713	Gm10282	1159	1.01069	3.69247	-1.86924	5e-05	0.00895807
ENSMUST00000048248	ENSMUSG00000035390	Brsk1	2996	19.5244	33.3767	-0.77356	5e-05	0.00895807
ENSMUST00000029846	ENSMUSG00000028195	Cyr61	2019	2.24778	3.91789	-0.801575	5e-05	0.00895807
ENSMUST00000023207	ENSMUSG00000022548	Apod	979	11.5188	36.9872	-1.68303	5e-05	0.00895807
ENSMUST00000047321	ENSMUSG00000055116	Arntl	2904	17.866	13.4877	0.405572	5e-05	0.00895807
ENSMUST00000087328	ENSMUSG00000091971	Hspa1a	2967	3.63064	2.10996	0.783007	5e-05	0.00895807
ENSMUST00000002176	ENSMUSG00000002107	Celf2	7718	14.2986	4.17747	1.77517	5e-05	0.00895807
ENSMUST00000105285	ENSMUSG00000019936	Epyc	2539	0.507597	1.14033	-1.1677	5e-05	0.00895807
ENSMUST00000138999	ENSMUSG00000026568	Mpc2	493	79.5992	42.867	0.892884	5e-05	0.00895807
ENSMUST00000094934	ENSMUSG00000070880	Gad1	3355	94.1115	63.3583	0.570837	5e-05	0.00895807
ENSMUST00000096014	ENSMUSG00000071528	Usmg5	341	1446.42	979.181	0.562836	5e-05	0.00895807
ENSMUST00000081134	ENSMUSG00000060445	Sycp2	5717	0.49954	1.06219	-1.08838	5e-05	0.00895807
ENSMUST00000064061	ENSMUSG00000060257	Scrt2	3395	0.911096	1.46403	-0.684265	5e-05	0.00895807
ENSMUST00000075304	ENSMUSG00000041488	Stx3	2457	3.44633	10.1946	-1.56467	5e-05	0.00895807
ENSMUST00000106635	ENSMUSG00000051497	Kcnj16	3671	1.3313	4.60352	-1.7899	5e-05	0.00895807
ENSMUST00000179436	ENSMUSG00000095742	CAAA01147332.1	251	93.4701	35.7207	1.38774	5e-05	0.00895807
ENSMUST00000034881	ENSMUSG00000032330	Cox7a2	754	387.097	273.286	0.502285	5e-05	0.00895807
ENSMUST00000167994	ENSMUSG00000051977	Prdm9	3460	0.185171	0.645088	-1.80064	5e-05	0.00895807
ENSMUST00000028187	ENSMUSG00000026840	Lamc3	5871	0.542745	1.00551	-0.889574	5e-05	0.00895807
ENSMUST00000046223	ENSMUSG00000041828	Abca8a	5614	3.01258	5.34578	-0.8274	5e-05	0.00895807
ENSMUST00000172815	ENSMUSG00000092216	Gm19345	998	1.85128	0.458993	2.01198	5e-05	0.00895807
ENSMUST00000112186	ENSMUSG00000041975	Mettl8	2347	3.46499	5.90488	-0.769055	5e-05	0.00895807
ENSMUST00000062765	ENSMUSG00000030443	Zfp583	2550	1.09412	2.31636	-1.08209	5e-05	0.00895807
ENSMUST00000059080	ENSMUSG00000039001	Rps21	394	2945.25	1783.1	0.724003	5e-05	0.00895807
ENSMUST00000051364	ENSMUSG00000044709	Gemin7	763	18.1975	8.48316	1.10106	5e-05	0.00895807
ENSMUST00000102964	ENSMUSG00000060093	Hist1h4a	539	202.001	130.893	0.625971	5e-05	0.00895807
ENSMUST00000102967	ENSMUSG00000060678	Hist1h4c	395	765.816	275.503	1.47493	5e-05	0.00895807
ENSMUST00000060716	ENSMUSG00000051354	Samd3	1874	0.267962	0.949173	-1.82464	5e-05	0.00895807
ENSMUST00000102969	ENSMUSG00000069272	Hist1h2ae	460	17.1223	10.0728	0.765405	5e-05	0.00895807
ENSMUST00000102968	ENSMUSG00000061482	Hist1h4d	393	837.585	510.133	0.715363	5e-05	0.00895807
ENSMUST00000028764	ENSMUSG00000027301	Oxt	537	38.6873	21.5946	0.841187	5e-05	0.00895807
ENSMUST00000029269	ENSMUSG00000027714	Exosc9	1617	14.24	21.9267	-0.622736	5e-05	0.00895807
ENSMUST00000028045	ENSMUSG00000026712	Mrc1	5374	1.62197	2.53453	-0.643968	5e-05	0.00895807
ENSMUST00000029266	ENSMUSG00000027712	Anxa5	1731	59.5502	34.8154	0.774383	5e-05	0.00895807
ENSMUST00000070631	ENSMUSG00000037921	Ddx60	5992	0.101225	0.447987	-2.14589	5e-05	0.00895807
ENSMUST00000180159	ENSMUSG00000045996	Polr2k	489	59.3927	39.0327	0.605601	5e-05	0.00895807
ENSMUST00000086535	ENSMUSG00000073702	Rpl31	1049	219.21	142.404	0.622319	5e-05	0.00895807
ENSMUST00000038423	ENSMUSG00000033355	Rtp4	1573	0.791804	1.72829	-1.12613	5e-05	0.00895807
ENSMUST00000020102	ENSMUSG00000019935	Slc17a8	4456	0.578833	1.62741	-1.49136	5e-05	0.00895807
ENSMUST00000049628	ENSMUSG00000050856	Atp5k	371	842.961	601.646	0.486551	5e-05	0.00895807
ENSMUST00000166950	ENSMUSG00000078974	Sec61g	754	84.2193	50.9388	0.725386	5e-05	0.00895807
ENSMUST00000054544	ENSMUSG00000049751	Rpl36al	526	270.383	189.183	0.515221	5e-05	0.00895807
ENSMUST00000127404	ENSMUSG00000072955	Tmsb15l	816	6.5897	1.58324	2.05733	5e-05	0.00895807
ENSMUST00000043938	ENSMUSG00000038910	Plcl2	4050	49.1632	66.9912	-0.446394	5e-05	0.00895807
ENSMUST00000025025	ENSMUSG00000024190	Dusp1	1990	9.07346	16.5291	-0.865282	5e-05	0.00895807
ENSMUST00000029406	ENSMUSG00000027824	Vmn2r1	2739	0.157774	0.650253	-2.04314	5e-05	0.00895807
ENSMUST00000029568	ENSMUSG00000027956	Tmem144	2898	4.83194	3.1073	0.636939	5e-05	0.00895807
ENSMUST00000087176	ENSMUSG00000050121	Opalin	1838	4.63874	6.81319	-0.554597	5e-05	0.00895807
ENSMUST00000001051	ENSMUSG00000001025	S100a6	731	24.7133	15.9178	0.634647	5e-05	0.00895807
ENSMUST00000058030	ENSMUSG00000062937	Mtap	2797	4.50295	2.49181	0.853675	5e-05	0.00895807
ENSMUST00000021674	ENSMUSG00000021250	Fos	2108	11.3983	17.494	-0.618047	5e-05	0.00895807
ENSMUST00000156844	ENSMUSG00000078875	Gm14419	752	17.263	10.1257	0.769661	5e-05	0.00895807
ENSMUST00000185187	ENSMUSG00000061762	Tac1	1230	29.5171	50.5625	-0.776519	5e-05	0.00895807
ENSMUST00000133324	ENSMUSG00000020672	Sntg2	1830	3.06355	1.48267	1.047	5e-05	0.00895807
ENSMUST00000032279	ENSMUSG00000030172	Erc1	8356	0.674057	3.16908	-2.23312	5e-05	0.00895807
ENSMUST00000164491	ENSMUSG00000090667	Gm765	3132	3.38658	2.21533	0.612311	5e-05	0.00895807
ENSMUST00000072271	ENSMUSG00000019232	Etnppl	4468	1.90862	3.04858	-0.67561	5e-05	0.00895807
ENSMUST00000100841	ENSMUSG00000015766	Eps8	4151	5.89444	1.35026	2.12612	5e-05	0.00895807
ENSMUST00000172785	ENSMUSG00000073411	H2-D1	2102	2.57622	4.23092	-0.715718	5e-05	0.00895807
ENSMUST00000005077	ENSMUSG00000004951	Hspb1	903	9.16685	5.16758	0.826936	5e-05	0.00895807
ENSMUST00000085668	ENSMUSG00000066647	Gm5113	3002	8.30675	5.16282	0.686125	5e-05	0.00895807
ENSMUST00000178343	ENSMUSG00000095041	PISD	4060	31.1831	11.4406	1.4466	5e-05	0.00895807
ENSMUST00000063492	ENSMUSG00000051920	Rspo2	3324	8.12312	3.80657	1.09354	5e-05	0.00895807
ENSMUST00000081982	ENSMUSG00000037259	Dzank1	6847	49.092	36.5921	0.423956	5e-05	0.00895807
ENSMUST00000068975	ENSMUSG00000057101	Zfp180	3901	24.1974	14.5214	0.736672	5e-05	0.00895807
ENSMUST00000103071	ENSMUSG00000020713	Gh	862	3.01122	0.778706	1.95119	5e-05	0.00895807
ENSMUST00000135737	ENSMUSG00000026839	Upp2	2848	1.24781	7.08122	-2.5046	5e-05	0.00895807
ENSMUST00000092639	ENSMUSG00000019899	Lama2	9614	1.86373	2.79903	-0.586738	5e-05	0.00895807
ENSMUST00000006254	ENSMUSG00000006095	Tbcb	1416	43.351	28.9989	0.580063	5e-05	0.00895807
ENSMUST00000109761	ENSMUSG00000003813	Rad23a	1842	12.0066	5.20599	1.20559	5e-05	0.00895807
ENSMUST00000015236	ENSMUSG00000015092	Edf1	722	110.77	67.2698	0.719534	5e-05	0.00895807
ENSMUST00000065291	ENSMUSG00000053070	9230110C19Rik	1592	6.20737	9.22004	-0.57079	5e-05	0.00895807
ENSMUST00000030317	ENSMUSG00000028583	Pdpn	1817	6.97095	4.42714	0.654981	5e-05	0.00895807
ENSMUST00000094964	ENSMUSG00000096141	Dnah7a	12245	0.550725	0.0589681	3.22333	5e-05	0.00895807
ENSMUST00000077687	ENSMUSG00000036641	Ccdc148	3977	5.19692	8.69583	-0.742667	5e-05	0.00895807
ENSMUST00000051065	ENSMUSG00000045441	Gprin3	8339	8.81993	3.73444	1.23987	5e-05	0.00895807
ENSMUST00000035120	ENSMUSG00000032532	Cck	685	464.126	357.779	0.37545	0.0001	0.0161792
ENSMUST00000195247	ENSMUSG00000058407	Txndc9	1699	4.41098	11.8596	-1.42688	0.0001	0.0161792
ENSMUST00000090180	ENSMUSG00000021904	Sema3g	4538	1.08574	1.64007	-0.595077	0.0001	0.0161792
ENSMUST00000106956	ENSMUSG00000061086	Myl4	900	12.644	19.1987	-0.602548	0.0001	0.0161792
ENSMUST00000162031	ENSMUSG00000058407	Txndc9	3381	9.93987	6.42442	0.62966	0.0001	0.0161792
ENSMUST00000179077	ENSMUSG00000096768	Erdr1	895	4.39688	1.68781	1.38133	0.0001	0.0161792
ENSMUST00000046807	ENSMUSG00000037762	Slc16a9	3756	0.436881	0.867582	-0.989761	0.0001	0.0161792
ENSMUST00000189707	ENSMUSG00000093803	Ppp2r3d	385	19.829	11.5103	0.784688	0.0001	0.0161792
ENSMUST00000084207	ENSMUSG00000071176	Arhgef10	5528	3.28917	4.74937	-0.530014	0.0001	0.0161792
ENSMUST00000004203	ENSMUSG00000004100	Ppan	1670	4.43374	6.67552	-0.590356	0.0001	0.0161792
ENSMUST00000020768	ENSMUSG00000020475	Pgam2	840	5.35828	8.33572	-0.637536	0.0001	0.0161792
ENSMUST00000105031	ENSMUSG00000078234	Klhdc7a	7807	1.84315	1.31639	0.485585	0.0001	0.0161792
ENSMUST00000023538	ENSMUSG00000022836	Mylk	7824	2.19574	2.98016	-0.440686	0.0001	0.0161792
ENSMUST00000105365	ENSMUSG00000045193	Cirbp	1321	42.6346	56.11	-0.396232	0.0001	0.0161792
ENSMUST00000021114	ENSMUSG00000020766	Galk1	1406	6.07765	4.04111	0.588762	0.0001	0.0161792
ENSMUST00000089257	ENSMUSG00000068154	Insm1	3100	2.38484	1.59509	0.580251	0.0001	0.0161792
ENSMUST00000190422	ENSMUSG00000101523	Gm10031	2653	0.496325	0.165457	1.58482	0.0001	0.0161792
ENSMUST00000043867	ENSMUSG00000039221	Rpl22l1	552	61.8604	110.354	-0.835057	0.0001	0.0161792
ENSMUST00000029331	ENSMUSG00000027765	P2ry1	3886	2.10826	0.966153	1.12573	0.0001	0.0161792
ENSMUST00000045537	ENSMUSG00000040495	Chrm4	1440	17.3709	12.3274	0.494798	0.0001	0.0161792
ENSMUST00000139045	ENSMUSG00000041921	Metap1d	2770	2.79589	0.579358	2.27078	0.0001	0.0161792
ENSMUST00000023453	ENSMUSG00000022769	Sdf2l1	1108	18.9038	13.4144	0.494893	0.0001	0.0161792
ENSMUST00000111194	ENSMUSG00000005087	Cd44	5045	0.457981	1.02294	-1.15936	0.0001	0.0161792
ENSMUST00000073080	ENSMUSG00000058927	Gm10053	949	1.78565	0.422285	2.08016	0.0001	0.0161792
ENSMUST00000126610	ENSMUSG00000038900	Rpl12	1242	141.722	94.2213	0.588938	0.0001	0.0161792
ENSMUST00000044355	ENSMUSG00000041571	Sepw1	736	417.772	547.636	-0.390502	0.0001	0.0161792
ENSMUST00000053308	ENSMUSG00000048424	Ranbp3l	3017	1.63158	2.44235	-0.581993	0.0001	0.0161792
ENSMUST00000032198	ENSMUSG00000030107	Usp18	1771	0.459305	1.1285	-1.29688	0.0001	0.0161792
ENSMUST00000050487	ENSMUSG00000024610	Cd74	1218	1.3736	2.74886	-1.00087	0.0001	0.0161792
ENSMUST00000076657	ENSMUSG00000035674	Ndufa3	515	237.723	170.793	0.477038	0.00015	0.0227923
ENSMUST00000070112	ENSMUSG00000026895	Ndufa8	861	90.8273	69.5276	0.385541	0.00015	0.0227923
ENSMUST00000163483	ENSMUSG00000020149	Rab1a	2657	16.0356	28.8646	-0.84802	0.00015	0.0227923
ENSMUST00000057054	ENSMUSG00000001493	Meox1	2228	0.375147	0.824647	-1.13632	0.00015	0.0227923
ENSMUST00000155120	ENSMUSG00000057948	Unc13d	991	2.52396	1.1401	1.14652	0.00015	0.0227923
ENSMUST00000082432	ENSMUSG00000007682	Dio2	5813	17.5069	22.5901	-0.367764	0.00015	0.0227923
ENSMUST00000089558	ENSMUSG00000057278	Snrpg	1055	30.2101	21.606	0.483604	0.00015	0.0227923
ENSMUST00000044148	ENSMUSG00000039740	Alg2	3021	28.1938	36.4815	-0.371788	0.00015	0.0227923
ENSMUST00000166899	ENSMUSG00000094856	Gm21962	1017	21.5538	29.1723	-0.436654	0.00015	0.0227923
ENSMUST00000111336	ENSMUSG00000058076	Sdhc	3171	13.9911	19.4672	-0.476538	0.00015	0.0227923
ENSMUST00000102484	ENSMUSG00000078515	Ddi2	9553	8.30873	11.0824	-0.415567	0.00015	0.0227923
ENSMUST00000102536	ENSMUSG00000059291	Rpl11	833	374.58	275.98	0.44071	0.00015	0.0227923
ENSMUST00000043286	ENSMUSG00000038425	Poli	2591	2.50581	0.892716	1.489	0.00015	0.0227923
ENSMUST00000166898	ENSMUSG00000091938	Gm2564	707	66.1193	49.4666	0.418616	0.00015	0.0227923
ENSMUST00000115230	ENSMUSG00000022548	Apod	1070	62.8436	35.8318	0.810527	0.00015	0.0227923
ENSMUST00000069180	ENSMUSG00000055538	Zcchc24	4556	7.67914	10.929	-0.509148	0.00015	0.0227923
ENSMUST00000100790	ENSMUSG00000022253	Nadk2	3666	11.1362	5.72954	0.958766	0.00015	0.0227923
ENSMUST00000045376	ENSMUSG00000039197	Adk	1781	54.8876	42.4967	0.369127	0.00015	0.0227923
ENSMUST00000113975	ENSMUSG00000089774	Slc5a3	10913	15.7962	12.054	0.390063	0.00015	0.0227923
ENSMUST00000063084	ENSMUSG00000020484	Xbp1	2129	55.7528	42.9004	0.378054	0.00015	0.0227923
ENSMUST00000106252	ENSMUSG00000028654	Mycl	3293	4.70484	1.46103	1.68716	0.00015	0.0227923
ENSMUST00000026360	ENSMUSG00000025321	Itgb8	8403	18.3495	14.4139	0.348272	0.00015	0.0227923
ENSMUST00000040912	ENSMUSG00000036777	Anln	5421	6.31647	8.35374	-0.403304	0.00015	0.0227923
ENSMUST00000057243	ENSMUSG00000048572	Tmem252	2462	0.498645	0.944889	-0.922131	0.00015	0.0227923
ENSMUST00000021078	ENSMUSG00000018861	Fdxr	1948	5.64346	3.7132	0.60392	0.00015	0.0227923
ENSMUST00000098230	ENSMUSG00000073982	Rhog	1269	2.80934	4.41402	-0.651864	0.00015	0.0227923
ENSMUST00000196520	ENSMUSG00000104713	Gbp6	2604	0.752705	1.30958	-0.798951	0.0002	0.0289073
ENSMUST00000100171	ENSMUSG00000026864	Hspa5	2613	194.311	149.735	0.375959	0.0002	0.0289073
ENSMUST00000022416	ENSMUSG00000021866	Anxa11	2394	5.09607	3.29354	0.629745	0.0002	0.0289073
ENSMUST00000087714	ENSMUSG00000067455	Hist1h4j	774	27.6825	20.0283	0.466933	0.0002	0.0289073
ENSMUST00000135941	ENSMUSG00000006412	Pfdn2	1735	13.954	19.6005	-0.490217	0.0002	0.0289073
ENSMUST00000108935	ENSMUSG00000074521	Gm14327	1451	7.88642	5.66907	0.476257	0.0002	0.0289073
ENSMUST00000028162	ENSMUSG00000026820	Ptges2	4978	7.64738	5.47653	0.481702	0.0002	0.0289073
ENSMUST00000022622	ENSMUSG00000059456	Ptk2b	4034	64.6566	44.8887	0.526446	0.0002	0.0289073
ENSMUST00000154650	ENSMUSG00000013523	Bcas1	2222	14.8288	20.0485	-0.435097	0.0002	0.0289073
ENSMUST00000170715	ENSMUSG00000044533	Rps2	998	23.6517	36.76	-0.63619	0.0002	0.0289073
ENSMUST00000039784	ENSMUSG00000036138	Acaa1a	1762	16.6611	8.00985	1.05664	0.0002	0.0289073
ENSMUST00000080322	ENSMUSG00000052776	Oas1a	1885	0.334109	0.841437	-1.33254	0.0002	0.0289073
ENSMUST00000127748	ENSMUSG00000043496	Tril	5363	5.04737	3.76193	0.424059	0.0002	0.0289073
ENSMUST00000035113	ENSMUSG00000032526	Deb1	517	80.2409	59.9002	0.421777	0.0002	0.0289073
ENSMUST00000102840	ENSMUSG00000076441	Ass1	1696	17.544	23.1705	-0.401316	0.0002	0.0289073
ENSMUST00000071135	ENSMUSG00000062591	Tubb4a	2228	86.6397	110.242	-0.347568	0.0002	0.0289073
ENSMUST00000109279	ENSMUSG00000018459	Slc13a3	3131	1.61907	0.513147	1.65773	0.0002	0.0289073
ENSMUST00000136312	ENSMUSG00000008348	Ubc	2618	92.0182	115.448	-0.327247	0.0002	0.0289073
ENSMUST00000016640	ENSMUSG00000016496	Cd274	3622	0.589914	0.95587	-0.696309	0.0002	0.0289073
ENSMUST00000072079	ENSMUSG00000061024	Rrs1	2048	6.58605	9.12347	-0.470169	0.0002	0.0289073
ENSMUST00000007139	ENSMUSG00000006941	Eif1b	917	100.829	77.5519	0.378671	0.00025	0.0345419
ENSMUST00000089752	ENSMUSG00000053754	Chd8	8190	3.70081	6.71823	-0.860241	0.00025	0.0345419
ENSMUST00000029451	ENSMUSG00000027858	Tspan2	4484	13.4033	17.3483	-0.372207	0.00025	0.0345419
ENSMUST00000029271	ENSMUSG00000027716	Trpc3	3694	4.31024	5.78166	-0.423717	0.00025	0.0345419
ENSMUST00000021203	ENSMUSG00000020843	Timm22	2817	14.4595	10.9161	0.405557	0.00025	0.0345419
ENSMUST00000166791	ENSMUSG00000042502	Cd2bp2	3284	12.5864	7.63879	0.720448	0.00025	0.0345419
ENSMUST00000145910	ENSMUSG00000024077	Strn	8629	20.1398	15.68	0.361124	0.00025	0.0345419
ENSMUST00000055389	ENSMUSG00000047434	Xxylt1	2987	4.11637	5.67191	-0.462462	0.00025	0.0345419
ENSMUST00000053764	ENSMUSG00000044167	Foxo1	8665	1.77147	2.36563	-0.417276	0.00025	0.0345419
ENSMUST00000001825	ENSMUSG00000001774	Chordc1	2205	46.5842	36.4915	0.35228	0.00025	0.0345419
ENSMUST00000096259	ENSMUSG00000071658	Gng3	1699	31.7204	44.8122	-0.498483	0.00025	0.0345419
ENSMUST00000067924	ENSMUSG00000054720	Lrrc8c	6976	3.33745	4.42946	-0.408384	0.00025	0.0345419
ENSMUST00000163582	ENSMUSG00000059895	Ptp4a3	3808	3.97246	0.681066	2.54417	0.00025	0.0345419
ENSMUST00000176010	ENSMUSG00000093674	Rpl41	582	984.151	615.812	0.676389	0.00025	0.0345419
ENSMUST00000102844	ENSMUSG00000020460	Rps27a	637	139.559	80.7438	0.789455	0.00025	0.0345419
ENSMUST00000032944	ENSMUSG00000030703	Gdpd3	1148	5.25516	3.10452	0.759366	0.00025	0.0345419
ENSMUST00000040077	ENSMUSG00000033020	Polr2f	543	64.0702	47.605	0.428541	0.00025	0.0345419
ENSMUST00000106355	ENSMUSG00000045268	Zfp691	1588	1.35804	0.622856	1.12455	0.00025	0.0345419
ENSMUST00000061169	ENSMUSG00000047658	Gal3st3	2421	6.16062	8.33777	-0.436585	0.00025	0.0345419
ENSMUST00000035625	ENSMUSG00000039519	Cyp7b1	2166	10.5074	7.62523	0.462552	0.00025	0.0345419
ENSMUST00000002379	ENSMUSG00000002308	Cd320	2209	4.33375	2.31034	0.907512	0.00025	0.0345419
ENSMUST00000008966	ENSMUSG00000008822	Acyp1	648	47.6244	35.5216	0.423004	0.0003	0.0399125
ENSMUST00000046644	ENSMUSG00000042043	Tbca	503	212.397	166.256	0.353359	0.0003	0.0399125
ENSMUST00000187137	ENSMUSG00000036634	Mag	2434	22.191	30.1232	-0.440902	0.0003	0.0399125
ENSMUST00000048781	ENSMUSG00000040618	Pck2	3400	6.94631	5.25421	0.402775	0.0003	0.0399125
ENSMUST00000077741	ENSMUSG00000060681	Slc9a6	4976	18.1373	11.9578	0.601013	0.0003	0.0399125
ENSMUST00000056153	ENSMUSG00000044788	Fads6	4951	4.80383	6.31882	-0.395468	0.0003	0.0399125
ENSMUST00000022145	ENSMUSG00000021643	Serf1	601	24.6667	15.0113	0.716516	0.0003	0.0399125
ENSMUST00000101800	ENSMUSG00000075705	Msrb1	1211	1.4731	3.5774	-1.28006	0.0003	0.0399125
ENSMUST00000005620	ENSMUSG00000005483	Dnajb1	2263	40.8973	31.9944	0.354186	0.0003	0.0399125
ENSMUST00000027467	ENSMUSG00000026249	Serpine2	2210	65.5944	50.4842	0.377741	0.0003	0.0399125
ENSMUST00000069451	ENSMUSG00000055737	Ghr	4175	2.49909	1.70992	0.547474	0.0003	0.0399125
ENSMUST00000108980	ENSMUSG00000078878	Gm14305	1167	23.4126	15.9274	0.555774	0.0003	0.0399125
ENSMUST00000024802	ENSMUSG00000024007	Ppil1	1434	11.326	8.26976	0.453725	0.0003	0.0399125
ENSMUST00000146824	ENSMUSG00000031683	Lsm6	541	37.2603	16.3913	1.18471	0.0003	0.0399125
ENSMUST00000183338	ENSMUSG00000037174	Elf2	1083	43.8741	29.0886	0.592916	0.0003	0.0399125
ENSMUST00000155802	ENSMUSG00000038147	Cd84	3291	0.239949	0.601229	-1.32519	0.0003	0.0399125
ENSMUST00000060214	ENSMUSG00000050854	Tmem125	1864	1.71869	2.66569	-0.633194	0.0003	0.0399125
ENSMUST00000205741	ENSMUSG00000013465	Nelfb	2636	17.1853	12.69	0.437483	0.0003	0.0399125
ENSMUST00000067048	ENSMUSG00000022262	Dnah5	15630	0.979096	1.31997	-0.430986	0.0003	0.0399125
ENSMUST00000030626	ENSMUSG00000028822	Tmem50a	1204	59.5914	76.0637	-0.352103	0.0003	0.0399125
ENSMUST00000078676	ENSMUSG00000063882	Uqcrh	547	572.299	443.527	0.367749	0.0003	0.0399125
ENSMUST00000170953	ENSMUSG00000090862	Rps13	589	267.831	208.331	0.362445	0.0003	0.0399125
ENSMUST00000029402	ENSMUSG00000027822	Slc33a1	3150	13.2838	8.93294	0.572458	0.0003	0.0399125
ENSMUST00000043148	ENSMUSG00000036402	Gng12	4248	11.2786	8.5516	0.399319	0.00035	0.045214
ENSMUST00000034728	ENSMUSG00000032198	Dock6	6556	0.617658	0.920785	-0.576057	0.00035	0.045214
ENSMUST00000033342	ENSMUSG00000031029	Eif3f	2514	26.1737	20.2374	0.371096	0.00035	0.045214
ENSMUST00000125077	ENSMUSG00000052407	Ccdc171	4231	1.29963	0.787197	0.723309	0.00035	0.045214
ENSMUST00000039758	ENSMUSG00000035885	Cox8a	545	1352.61	1072.99	0.334115	0.00035	0.045214
ENSMUST00000067925	ENSMUSG00000054717	Hmgb2	2692	1.00867	1.56782	-0.636308	0.00035	0.045214
ENSMUST00000177921	ENSMUSG00000096808	AC132444.6	1500	1.46109	2.5448	-0.800512	0.00035	0.045214
ENSMUST00000129829	ENSMUSG00000039997	Ifi203	3054	0.118924	0.416118	-1.80695	0.00035	0.045214
ENSMUST00000043675	ENSMUSG00000038717	Atp5l	511	612.66	484.633	0.338194	0.00035	0.045214
ENSMUST00000169927	ENSMUSG00000042429	Adora1	4581	5.35874	9.97924	-0.897037	0.00035	0.045214
ENSMUST00000026565	ENSMUSG00000025492	Ifitm3	678	3.92549	6.53203	-0.734659	0.00035	0.045214
ENSMUST00000112359	ENSMUSG00000042328	Hps4	3345	3.33248	1.75422	0.925769	0.00035	0.045214
ENSMUST00000038194	ENSMUSG00000022360	Atad2	5683	3.80782	2.84409	0.420995	0.00035	0.045214
ENSMUST00000020970	ENSMUSG00000020641	Rsad2	3775	0.39366	0.681637	-0.792054	0.00035	0.045214
ENSMUST00000008830	ENSMUSG00000094441	Zfp955a	1638	18.3613	14.0446	0.386649	0.00035	0.045214
